# Supplementary material for: Clinical Impact of Tumor-Infiltrating Inflammatory Cells in Primary Small Cell Esophageal Carcinoma
Source: MDPI journal article supplement (doi:10.3390/ijms15069718), 2014-05-30
Supplement: s1 [file s1]

## Supplementary Information

**Table S1.** Patients' demographics, clinico-pathological characteristics and treatment.

| Characteristic               | No. of Patients ( <i>n</i> = 36) |            |
|------------------------------|----------------------------------|------------|
| Gender                       | Male                             | 25         |
|                              | Female                           | 11         |
| Age, years                   | 59 (45–77)                       |            |
| Location of tumor            | Ut                               | 3          |
|                              | Mt                               | 23         |
|                              | Lt                               | 10         |
| Treatment                    | S                                | 24         |
|                              | S + C                            | 9          |
|                              | S + C + R                        | 3          |
| Median survival time, months |                                  | 22 (2–143) |

Abbreviations: Lt, lower thoracic esophagus; Mt, middle thoracic esophagus; Ut, upper thoracic esophagus; S, surgery; C, chemotherapy; R, radiotherapy.

**Table S2.** Inflammatory-cell infiltration in SmCEC (small cell esophageal carcinoma) and ESqCC (esophageal squamous cell carcinoma).

| Inflammatory Cell Type | Cell Count (Mean ± SD)/HPF | <i>p</i> |
|------------------------|----------------------------|----------|
| <i>Eosinophils</i>     |                            |          |
| SmCEC ( <i>n</i> = 36) | 7.57 ± 4.63/HPF            | 0.038    |
| ESqCC ( <i>n</i> = 16) | 13.15 ± 7.41/HPF           | -        |
| <i>Neutrophils</i>     |                            |          |
| SmCEC ( <i>n</i> = 36) | 1.93 ± 1.14/HPF            | 0.071    |
| ESqCC ( <i>n</i> = 16) | 2.31 ± 0.68/HPF            | -        |
| <i>Lymphocytes</i>     |                            |          |
| SmCEC ( <i>n</i> = 36) | 89.64 ± 23.90/HPF          | 0.286    |
| ESqCC ( <i>n</i> = 16) | 100.11 ± 39.85/HPF         | -        |
| <i>Macrophages</i>     |                            |          |
| SmCEC ( <i>n</i> = 36) | 15.12 ± 8.53/HPF           | <0.001   |
| ESqCC ( <i>n</i> = 16) | 28.12 ± 7.91/HPF           | -        |

Abbreviations: HPF, High-Power Field.

**Table S3.** Tumor-infiltrating inflammatory cells in small cell lung cancer, ESqCC and SmCEC.

| Inflammatory Cell Type | Small Cell Lung Cancer                                                                              | ESqCC                                                                                                                                 | SmCEC in this Study                                                 |
|------------------------|-----------------------------------------------------------------------------------------------------|---------------------------------------------------------------------------------------------------------------------------------------|---------------------------------------------------------------------|
| Macrophages            | A high number of intratumoral macrophages was associated with a favorable survival [26]             | The 5-year survival rate of patients with high MφI total was significantly lower than that of patients with low MφI total [12]        | High macrophage counts were correlated with better overall survival |
| Eosinophils            | No related information                                                                              | Cases associated with a larger number of tumor-associated eosinophil infiltrations usually demonstrated better clinical outcomes [13] | High eosinophil counts were correlated with better overall survival |
| Lymphocytes            | A high number of intratumoral T cells was associated with a significantly better survival time [26] | Dense tumor infiltration by UCHL-1-positive T-cells within the cancer cell nests was related to a better prognosis [65]               | No statistical significance                                         |
| Neutrophils            | No related information                                                                              | No related information                                                                                                                | No statistical significance                                         |

© 2014 by the authors; licensee MDPI, Basel, Switzerland. This article is an open access article distributed under the terms and conditions of the Creative Commons Attribution license (<http://creativecommons.org/licenses/by/3.0/>).
